# Supplementary material for: Towards simplified graph neural networks for identifying cancer driver genes in heterophilic networks
Source: PubMed Central journal article supplement (PMC11697181; doi:10.1093/bib/bbae691), 2025-01-03
Supplement: sgcd_supplementary_bbae691.pdf [file sgcd_supplementary_bbae691.pdf]

# Towards Simplified Graph Neural Networks for Identifying Cancer Driver Genes in Heterophilic Networks

Xingyi Li<sup>1,3,4,\*</sup>, Jialuo Xu<sup>1</sup>, Junming Li<sup>2,3</sup>, Jia Gu<sup>4</sup> and Xuequn Shang<sup>1,\*</sup>

<sup>1</sup>School of Computer Science, Northwestern Polytechnical University, Xi'an, Shaanxi, 710072;

<sup>2</sup>School of Software, Northwestern Polytechnical University, Xi'an, Shaanxi, 710072;

<sup>3</sup>Research & Development Institute of Northwestern Polytechnical University in Shenzhen Shenzhen, 518063, China; <sup>4</sup>Faculty of Data Science, City University of Macau, Macau, 999078, China.

## 1. Potential cancer driver genes

Table S1.: Potential cancer driver genes

|     |          |     |          |     |         |     |          |     |          |     |          |     |          |     |          |     |          |     |         |
|-----|----------|-----|----------|-----|---------|-----|----------|-----|----------|-----|----------|-----|----------|-----|----------|-----|----------|-----|---------|
| 1   | TP53BP1  | 2   | EEF1A1   | 3   | MEIS1   | 4   | MDC1     | 5   | PRKCA    | 6   | UBE2I    | 7   | ARRB1    | 8   | PRKCZ    | 9   | HIST1H3F | 10  | BMP4    |
| 11  | VCAM1    | 12  | SOS1     | 13  | HSPA1B  | 14  | CALM2    | 15  | PPARGC1A | 16  | PLCG2    | 17  | TNFRSF1A | 18  | UBB      | 19  | CUBN     | 20  | CHEK1   |
| 21  | TERF1    | 22  | COL11A1  | 23  | PRPF8   | 24  | HIST1H3D | 25  | PPP2R1B  | 26  | GNB1     | 27  | DYNC1H1  | 28  | KDM5B    | 29  | TGFB2    | 30  | MYLK    |
| 31  | SMARCC2  | 32  | FANCM    | 33  | TF      | 34  | PAXIP1   | 35  | ACTN2    | 36  | RELB     | 37  | PIK3CG   | 38  | RPS27A   | 39  | VCP      | 40  | ACTB    |
| 41  | APP      | 42  | RELN     | 43  | LRP1    | 44  | FGF9     | 45  | TAB2     | 46  | NCOA6    | 47  | IGF2R    | 48  | PIK3CD   | 49  | YAP1     | 50  | CDH2    |
| 51  | RARB     | 52  | PPP1CA   | 53  | MAP3K5  | 54  | TRIM28   | 55  | NFKB1    | 56  | HDAC1    | 57  | DSP      | 58  | PTPRJ    | 59  | TCF4     | 60  | ZBTB7A  |
| 61  | DNM1     | 62  | LYN      | 63  | EGLN3   | 64  | NR2F2    | 65  | NGF      | 66  | TOP2A    | 67  | RIMS2    | 68  | HIST1H3H | 69  | WNT2     | 70  | NEB     |
| 71  | WNT5A    | 72  | ANXA1    | 73  | PXN     | 74  | ZNF263   | 75  | NOS1     | 76  | FLG      | 77  | HDAC2    | 78  | RFX5     | 79  | HUWE1    | 80  | SHC1    |
| 81  | TBP      | 82  | IRF1     | 83  | AHR     | 84  | DLG1     | 85  | HDAC6    | 86  | HIPK2    | 87  | IRS1     | 88  | PAK2     | 89  | SDC2     | 90  | ID2     |
| 91  | LAMB1    | 92  | GRB2     | 93  | RUNX2   | 94  | MAP3K3   | 95  | IL16     | 96  | F2       | 97  | COPS5    | 98  | SIRT1    | 99  | TLN1     | 100 | LRP2    |
| 101 | PRKCE    | 102 | FZD4     | 103 | SMARCA2 | 104 | EPHA2    | 105 | REST     | 106 | GSN      | 107 | GNAL     | 108 | NALCN    | 109 | GNGT1    | 110 | RYR1    |
| 111 | NEDD4    | 112 | IKBKKG   | 113 | RASA1   | 114 | ACAN     | 115 | TTN      | 116 | ITGB1    | 117 | APOB     | 118 | PPP2CA   | 119 | WNT1     | 120 | PIK3R2  |
| 121 | NFKBIA   | 122 | LRP6     | 123 | PTK2B   | 124 | CSNK2A1  | 125 | PDPK1    | 126 | ANK2     | 127 | RYK      | 128 | CDK1     | 129 | CEBPB    | 130 | ATF2    |
| 131 | SOD1     | 132 | SIN3A    | 133 | MAPT    | 134 | MAPK3    | 135 | CFTR     | 136 | RXRA     | 137 | RELA     | 138 | ATXN1    | 139 | BTRC     | 140 | HCK     |
| 141 | KHDRBS1  | 142 | ITGA1    | 143 | GAPDH   | 144 | GABPA    | 145 | LRRK2    | 146 | MAFF     | 147 | OBSCN    | 148 | CALM3    | 149 | INS      | 150 | YY1     |
| 151 | ACTL6A   | 152 | COL4A1   | 153 | EFTUD2  | 154 | MAFK     | 155 | ABCA1    | 156 | SIX5     | 157 | RYR3     | 158 | TRAF6    | 159 | EXO1     | 160 | PLK1    |
| 161 | HIST1H3J | 162 | NAV3     | 163 | IRAK1   | 164 | UCHL5    | 165 | HDAC5    | 166 | ZNF143   | 167 | PRKACB   | 168 | SETDB1   | 169 | CSF2RA   | 170 | HSPA1A  |
| 171 | CAT      | 172 | SUMO1    | 173 | HDAC3   | 174 | UNC79    | 175 | PPP2R5C  | 176 | DNAH5    | 177 | ANK3     | 178 | NR3C1    | 179 | HIST1H3E | 180 | PLG     |
| 181 | RYR2     | 182 | HSPB1    | 183 | UBQLN4  | 184 | KAT5     | 185 | TNFSF10  | 186 | NR2C2    | 187 | JAG1     | 188 | PRKCQ    | 189 | UBC      | 190 | JUND    |
| 191 | NR4A1    | 192 | TGFBR1   | 193 | COL1A2  | 194 | HSPG2    | 195 | CUL1     | 196 | CTBP2    | 197 | FBN1     | 198 | GSK3B    | 199 | E2F4     | 200 | CDK2    |
| 201 | PBX3     | 202 | MAPK14   | 203 | YES1    | 204 | IL2RG    | 205 | HSPA4    | 206 | BUB1     | 207 | YWHAZ    | 208 | CEBPD    | 209 | IKBKE    | 210 | VCAN    |
| 211 | SOCS3    | 212 | HSPA5    | 213 | ITGB3   | 214 | USF1     | 215 | PLEC     | 216 | ATF3     | 217 | LEP      | 218 | RPS6KA2  | 219 | DST      | 220 | SPTBN1  |
| 221 | CTNNA1   | 222 | HIST1H3I | 223 | MED1    | 224 | STAT5A   | 225 | SPTAN1   | 226 | CHUK     | 227 | HIST1H3G | 228 | VCL      | 229 | TAF1     | 230 | TFAP2C  |
| 231 | IGF2     | 232 | ACTA1    | 233 | ALB     | 234 | NFATC1   | 235 | FOXA2    | 236 | SPI1     | 237 | U2AF2    | 238 | FREM2    | 239 | SREBF2   | 240 | SMARCC1 |
| 241 | PAX6     | 242 | PIK3R3   | 243 | TFAP2A  | 244 | FOS      | 245 | PTK2     | 246 | UBA52    | 247 | IFNG     | 248 | ISG15    | 249 | NOTCH3   | 250 | BATF    |
| 251 | NGFR     | 252 | SP1      | 253 | SPTA1   | 254 | PTPN1    | 255 | HNF4G    | 256 | GTF2B    | 257 | TP73     | 258 | TJP1     | 259 | BMP7     | 260 | TYK2    |
| 261 | BAG3     | 262 | ITPR1    | 263 | ICAM1   | 264 | SMAD7    | 265 | ZAP70    | 266 | HIST1H3C | 267 | NFYB     | 268 | CSMD1    | 269 | GAB2     | 270 | POLR2A  |
| 271 | STAT1    | 272 | SMC3     | 273 | USH2A   | 274 | PRKDC    | 275 | ACTA2    | 276 | HDAC4    | 277 | MEF2C    | 278 | IQGAP1   | 279 | BMP2     | 280 | GLI3    |
| 281 | GRIP1    | 282 | TRAF2    | 283 | ITCH    | 284 | HGS      | 285 | FN1      | 286 | HSPD1    | 287 | ELF1     | 288 | CHD3     | 289 | HTT      | 290 | JUP     |
| 291 | INSR     | 292 | SYNE1    | 293 | IRS2    | 294 | COL5A1   | 295 | CALM1    | 296 | LAMA1    | 297 | HSPA8    | 298 | SLC2A1   | 299 | MACF1    | 300 | ITGB4   |
| 301 | GNAI1    | 302 | IL2RB    | 303 | CACNA1A | 304 | MCL1     | 305 | FLNC     | 306 | PRKCD    | 307 | DLG4     | 308 | NCAM1    | 309 | HNF4A    | 310 | SNCA    |
| 311 | FYN      | 312 | DMD      | 313 | CDC42   | 314 | SRF      | 315 | MEF2A    |     |          |     |          |     |          |     |          |     |         |

We use SGCD to train and predict on six PPIs. Then, by taking the union of the top 100 predicted cancer driver genes from each PPIs, a list of 315 potential cancer

\*Corresponding author: xingyili@nwpu.edu.cn, shang@nwpu.edu.cn

driver genes is obtained, as shown in Table. S1. To further analyze these potential cancer genes, we compare them with two lists of candidate cancer driver genes derived from literature-based sources. The first source is the CancerMine <sup>[1]</sup>, a text-mined and regularly updated resource which catalogs drivers, oncogenes and tumor suppressor genes (TSGs) across various cancer types. The second source is a high-confidence gene set collected from the Candidate Cancer Gene Database (CCGD) <sup>[2]</sup>, which includes all published data from transposon-based forward genetic screens for cancer. Overall, approximately 91% (287/315) of the potential driver genes have evidences supporting their association with cancer. Furthermore, among these evidence-supported genes, over 88% (253/287) are supported by CancerMine, over 76% (220/287) are supported by CCGD and over 64% (186/287) are supported by both CancerMine and CCGD. These experimental results further substantiate the strong reliability of the cancer driver genes identified by SGCD.

## 2. The homophily ratio of PPIs

To assess the level of heterophily in PPIs, we introduce the homophily ratio to determine whether a network exhibits homophilic or heterophilic characteristics <sup>[3]</sup>. The homophily ratio is calculated as the proportion of neighboring nodes belonging to the same class relative to the total number of neighboring nodes in the graph, and can be defined as follows:

$$h = \frac{1}{|\mathcal{V}|} \sum_{v_i \in \mathcal{V}} \frac{|\{v_j | v_j \in \mathcal{N}_i, Y_j = Y_i\}|}{|\mathcal{N}_i|} \quad (1)$$

where  $\mathcal{V}$  is the set of nodes,  $\mathcal{N}_i$  is the neighbor set of node  $v_i$ ,  $Y_i$  is label of node  $v_i$ . Graphs that exhibit strong homophily are characterized by a high homophily ratio approaching 1, whereas graphs with heterophily (i.e., low or weak homophily) have an edge homophily ratio that tends toward 0 <sup>[4]</sup>.

The homophily ratios of PPIs are shown in Table S2. The results show that PPIs from different databases all exhibit low homophily ratios, indicating that there are a small number of similar nodes among the neighbors of driver genes. This also suggests that there are too many inter-class edges in the PPIs, which leads to the confusion of features between different types of nodes after aggregation, making them indistinguishable and thus affecting the performance of GCNs.

Table S2.: The overview of PPIs

| Name           | Number of Edges | Number of Nodes | Number of Positive Samples | Number of Negative Samples | Homophily Ratio |
|----------------|-----------------|-----------------|----------------------------|----------------------------|-----------------|
| CPDB           | 252,189         | 13,627          | 796                        | 2187                       | 0.1568          |
| STRINGdb       | 336,549         | 13,179          | 783                        | 2415                       | 0.1889          |
| MULTINET       | 109,567         | 14,398          | 790                        | 3709                       | 0.1002          |
| PCNet          | 2,724,724       | 19,781          | 859                        | 5483                       | 0.1911          |
| IRefIndex      | 371,568         | 17,013          | 836                        | 4056                       | 0.1678          |
| IRefIndex 2015 | 91,809          | 12,129          | 785                        | 1973                       | 0.1547          |

### 3. Acquisition of pan-cancer multiomics data

We collect cancer genomics (mutations and copy number), epigenomics (DNA methylation), and transcriptomics (gene expression) from the cancer genome atlas (TCGA, <https://portal.gdc.cancer.gov/>), encompassing over 29,446 samples across 16 distinct cancer types, including Bladder Urothelial Carcinoma (BLCA), Breast invasive carcinoma (BRCA), Cholangiocarcinoma (CHOL), Colon adenocarcinoma (COAD), Esophageal carcinoma (ESCA), Head and Neck squamous cell carcinoma (HNSC), Kidney renal clear cell carcinoma (KIRC), Kidney renal papillary cell carcinoma (KIRP), Liver hepatocellular carcinoma (LIHC), Lung adenocarcinoma (LUAD), Lung squamous cell carcinoma (LUSC), Pancreatic adenocarcinoma (PAAD), Prostate adenocarcinoma (PRAD), Rectum adenocarcinoma (READ), Thyroid carcinoma (THCA), and Uterine Corpus Endometrial Carcinoma (UCEC). For each gene, we calculate gene mutation rate, copy number aberrations (CNAs), differential DNA methylation rate, and differential gene expression rate across the 16 cancer types:

- Gene mutation rate

The mutation rate of each gene in a given cancer type is defined as the number of non-silent mutations in that gene, divided by its exonic length. To compute gene mutation rate, we acquire exon lengths genomic annotation data obtained from GENCODE [5]. The gene mutation rate is calculated as:

$$mf_i^c = \frac{1}{|p_c|} \sum_{p \in p_c} F_{p,i} \quad (2)$$

For cancer type  $c$ ,  $P_c$  is the set of patients and  $F_{p,i}$  is the mutation frequency for the sample from the patient  $p$  of the gene  $i$ .

- CNAs

Gene-associated CNAs are collected from TCGA data, encompassing both amplifications and deletions, while ultramutated samples from syn1729383 are excluded from our study. The copy number rate for each gene is defined as the total number of times that gene is either amplified or deleted in a specific cohort.

- Differential DNA methylation rate

DNA methylation data is collected from the Illumina Human Methylation 450K BeadChip for tumor and corresponding tumor-adjacent normal tissue samples. The differential DNA methylation rate is calculated as:

$$dm_i^c = \frac{1}{N_d} \sum_{p \in p_c} (\beta_{p,i}^t - \beta_{p,i}^n) \quad (3)$$

where  $\beta_{p,i}^t$  and  $\beta_{p,i}^n$  are the DNA methylation level for the tumor sample and the normal sample respectively from the patient  $p$  of the gene  $i$  in cancer type  $c$ .  $N_d$  is the number of patients who have paired tumor samples and corresponding tumor-adjacent tissue samples (normal samples).

- Differential gene expression rate

We filter out genes whose number of zero values are more than 10% of the total number of samples to reduce the impact of noise. Subsequently, all the data

are log2-transformed. The differential gene expression rate is calculated as:

$$ge_i^c = \frac{1}{N_e} \sum_{p \in P_c} \log_2 \left( \frac{V_{p,i}^t}{V_{p,i}^n} \right) \quad (4)$$

where  $V_{p,i}^t$  and  $V_{p,i}^n$  are the gene expression level for the tumor sample and the normal sample respectively from the patient  $p$  of the gene  $i$  in cancer type  $c$ .  $N_e$  is the number of patients who have both tumor and normal samples in gene expression data.

By concatenating these vectors across all cancer types, we obtain a 64-dimensional feature vector for each gene. Finally, feature-wise min-max normalization is applied to each gene.

#### 4. Drug sensitivity analysis

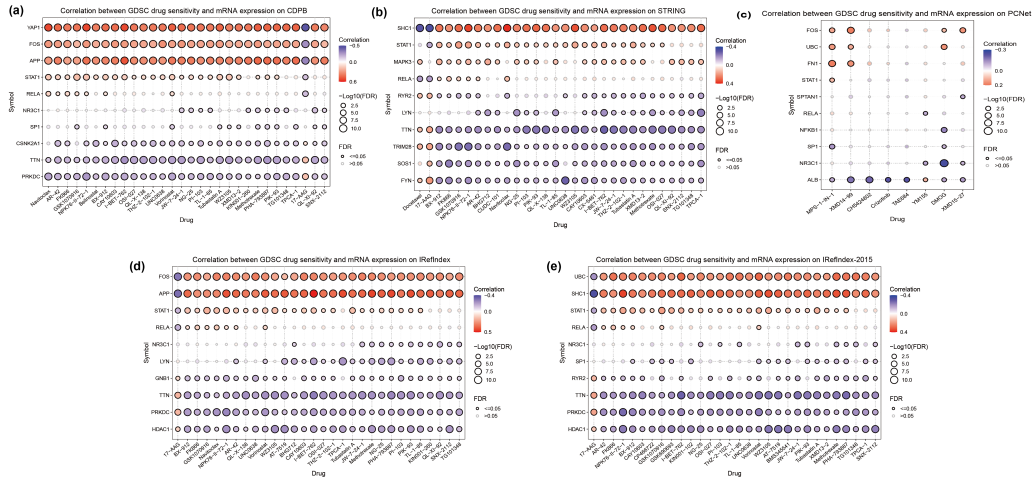

Fig. S1.: Drug sensitivity analysis of SGCD.

- (a) Drug sensitivity analysis on CPDB. (b) Drug sensitivity analysis on STRINGdb. (c) Drug sensitivity analysis on PCNet. (d) Drug sensitivity analysis on IRefIndex. (e) Drug sensitivity analysis on IRefIndex-2015.

We select the top 10 predicted cancer driver genes in each dataset for Cancer Therapeutics Response Portal (CPTR) drug sensitivity analysis using Gene Set Cancer Analysis (GSCA, <http://bioinfo.life.hust.edu.cn/GSCA>) [6, 7]. Fig. S1 shows the drug sensitivity analysis results for different datasets including CPDB, STRING, PCNet, IRefIndex, and IRefIndex-2015. The results of the drug sensitivity analysis reveal that cancer driver genes identified by SGCD provide crucial insights into potential drug targets, enhancing both the effectiveness and precision of cancer treatments. For example, BCL-2 family inhibitors, such as Navitoclax, have been investigated for their potential as anti-cancer therapies. Navitoclax induces apoptosis in cancer cells by disrupting the interactions of anti-apoptotic proteins[8]. Docetaxel (DTX) is recognized as one of the most potent anticancer agents, with broad applicability across various cancer

treatments<sup>[9]</sup>. OSI-027, an orally bioavailable compound, has demonstrated anti-cancer activity in multiple cancer cell lines and tumor xenograft models<sup>[10]</sup>. Vorinostat has also been evaluated in numerous clinical trials for treating a wide range of hematological and solid tumors, including lymphoma, breast cancer, non-small cell lung cancer (NSCLC), glioblastoma multiforme, and head and neck squamous cell carcinomas<sup>[11]</sup>.

## 5. Gene module dissection in pan-cancer

We employ the model-agnostic approach GNNExplainer<sup>[12]</sup> to interpret the contribution factors to cancer driver genes within the multi-omics, and further identify the cancer gene modules. After that, we compare the topological structures of cancer gene modules and non-cancer gene modules using graphical metrics, including PageRank, clustering coefficient, degree centrality, and betweenness centrality<sup>[13]</sup>.

- PageRank

The PageRank algorithm can reflect the importance or centrality of nodes in a network, and the PageRank centrality of a node  $i$  is calculated as follows:

$$C_{PR}(i) = d \left( \sum_{j \in \Gamma^-(i)} \frac{C_{PR}(j)}{|\Gamma^+(j)|} \right) + \frac{1-d}{n} \quad (5)$$

where  $\Gamma^-(j)$  is the set of nodes pointing to node  $i$ ,  $\Gamma^+(j)$  is the set of nodes pointed to by node  $j$ ,  $d$  is a damping factor, and  $n$  represents the number of nodes

- Clustering coefficient

Clustering coefficient measures the proportion of closed triangles within a node’s local neighborhood. The commonly used local variant of the clustering coefficient is computed as follows:

$$C_u = \frac{|\{(v_1, v_2) \in \mathcal{E} : v_1, v_2 \in \mathcal{N}(u)\}|}{\binom{d_u}{2}}. \quad (6)$$

Where the numerator counts the number of edges between the neighbors of node  $u$ ,  $\mathcal{N}(u) = \{v \in \mathcal{V} : (u, v) \in \mathcal{E}\}$  denotes the neighborhood of node  $u$ , and the denominator calculates the total number of pairs of nodes in  $u$ ’s neighborhood.

- Degree centrality

Degree centrality is a simple and effective local centrality metric that measures the centrality of a node based on the number of links it has with its neighbors. Degree Centrality can be defined as follows:

$$C_D(i) = \frac{1}{n-1} \sum_{j=1}^n a_{ij} \quad (7)$$

where  $a_{ij}$  is an element of the adjacency matrix  $A$ , indicating the connectivity between

nodes  $i$  and  $j$ . Specifically,  $a_{ij} = 1$  if a link exists between nodes  $i$  and  $j$ , otherwise  $a_{ij} = 0$ .

- Betweenness centrality

Betweenness centrality quantifies a node’s centrality by calculating the ratio of the number of shortest paths between any pair of nodes that pass through the given node to the total number of shortest paths between that pair. It can be defined as follows:

$$C_B(i) = \sum_{i \neq j \neq k \in V} \frac{|SP_{jik}|}{|SP_{jk}|} \quad (8)$$

where  $SP_{jk}$  represents the set of shortest paths between nodes  $j$  and  $k$ , while  $SP_{jik}$  denotes the subset of these shortest paths that pass through node  $i$ .

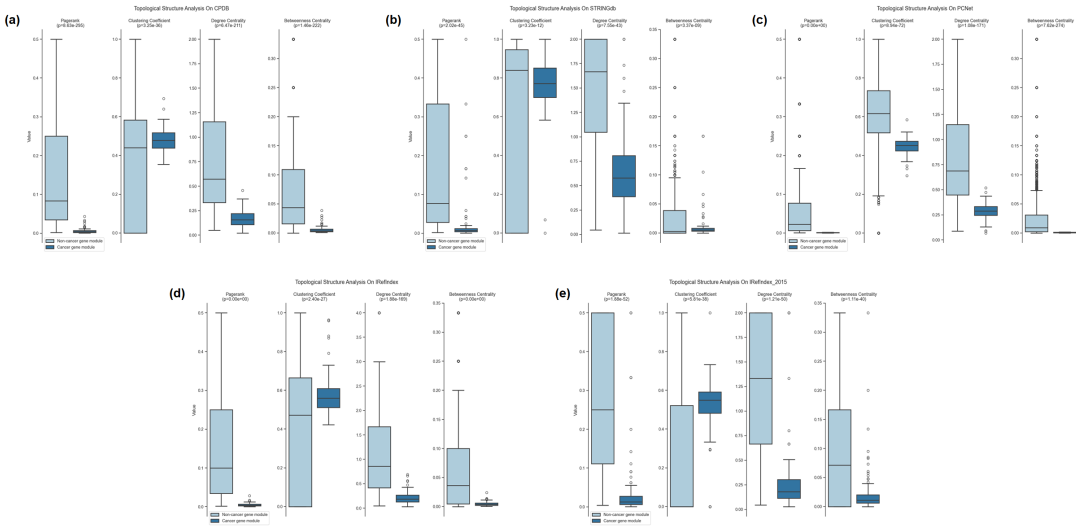

Fig. S2.: Graphical metrics of gene modules

(a) Topological analysis on CPDB. (b) Topological analysis on STRINGdb. (c) Topological analysis on PCNet. (d) Topological analysis on IRefIndex. (e) Topological analysis on IRefIndex-2015.

Fig. S2 gives the results of comparison of the topological structures of cancer gene modules and non-cancer gene modules using graphical metrics in different datasets including CPDB, STRING, PCNet, IRefIndex, and IRefIndex-2015, and reveals a striking difference between cancer gene modules and non-cancer gene modules. Specifically, the results indicate significant differences in the topological structures between cancer and non-cancer gene modules. This finding is supported by a highly significant p-value from t-test, which underscores the robustness of the observed difference.

## References

- [1] J. Lever, E. Y. Zhao, J. Grewal, M. R. Jones, and S. J. Jones, “Cancermine: a literature-mined resource for drivers, oncogenes and tumor suppressors in cancer,” *Nature methods*, vol. 16, no. 6, pp. 505–507, 2019.

- [2] K. L. Abbott, E. T. Nyre, J. Abrahante, Y.-Y. Ho, R. Isaksson Vogel, and T. K. Starr, "The candidate cancer gene database: a database of cancer driver genes from forward genetic screens in mice," Nucleic acids research, vol. 43, no. D1, pp. D844–D848, 2015.
- [3] Y. Ma, X. Liu, N. Shah, and J. Tang, "Is homophily a necessity for graph neural networks?" arXiv preprint arXiv:2106.06134, 2021.
- [4] J. Zhu, Y. Yan, L. Zhao, M. Heimann, L. Akoglu, and D. Koutra, "Beyond homophily in graph neural networks: Current limitations and effective designs," Advances in neural information processing systems, vol. 33, pp. 7793–7804, 2020.
- [5] A. Frankish, M. Diekhans, I. Jungreis, J. Lagarde, J. E. Loveland, J. M. Mudge, C. Sisu, J. C. Wright, J. Armstrong, I. Barnes et al., "Gencode 2021," Nucleic acids research, vol. 49, no. D1, pp. D916–D923, 2021.
- [6] C.-J. Liu, F.-F. Hu, M.-X. Xia, L. Han, Q. Zhang, and A.-Y. Guo, "Gscalite: a web server for gene set cancer analysis," Bioinformatics, vol. 34, no. 21, pp. 3771–3772, 2018.
- [7] C.-J. Liu, F.-F. Hu, G.-Y. Xie, Y.-R. Miao, X.-W. Li, Y. Zeng, and A.-Y. Guo, "Gsca: an integrated platform for gene set cancer analysis at genomic, pharmacogenomic and immunogenomic levels," Briefings in bioinformatics, vol. 24, no. 1, p. bbac558, 2023.
- [8] N. N. Mohamad Anuar, N. S. Nor Hisam, S. L. Liew, and A. Ugusman, "Clinical review: Navitoclax as a pro-apoptotic and anti-fibrotic agent," Frontiers in Pharmacology, vol. 11, 2020.
- [9] N. Chaurawal and K. Raza, "Nano-interventions for the drug delivery of docetaxel to cancer cells," Health Sciences Review, vol. 7, p. 100101, 2023.
- [10] M. Rehan, "An anti-cancer drug candidate osi-027 and its analog as inhibitors of mtor: Computational insights into the inhibitory mechanisms," Journal of Cellular Biochemistry, vol. 118, 2017. [Online]. Available: <https://api.semanticscholar.org/CorpusID:1169963>
- [11] V. K. H. Le, T. P. D. Pham, and D. H. Truong, "Delivery systems for vorinostat in cancer treatment: An updated review," Journal of Drug Delivery Science and Technology, vol. 61, p. 102334, 2021. [Online]. Available: <https://www.sciencedirect.com/science/article/pii/S1773224721000150>
- [12] Z. Ying, D. Bourgeois, J. You, M. Zitnik, and J. Leskovec, "Gnnexplainer: Generating explanations for graph neural networks," Advances in neural information processing systems, vol. 32, 2019.
- [13] K. Chi, N. Wang, T. Su, Y. Yang, and H. Qu, "Measuring the centrality of nodes in networks based on the interstellar model," Information Sciences, p. 120908, 2024.
